# Supplementary material
Source: PubMed Central journal article supplement (PMC3003399)
Supplement: supp_M110.138743_jbc.M110.138743-1.pdf [file supp_M110.138743_jbc.M110.138743-1.pdf]

## SUPPLEMENTARY

**Figure S1. PCNA expression is suppressed in the liver of *grnA* morphants.** The PCNA-positive signal, indicated by the brown nuclei (red arrows), was lower in MO-treated hepatocytes (B) compared with control hepatocytes (A). (C) The mean number of PCNA-stained cells in the controls or *grnA*-knockdown hepatocytes was calculated at 4 dpf. hpf, hours post-fertilization. Scale bars, 25  $\mu$ m.

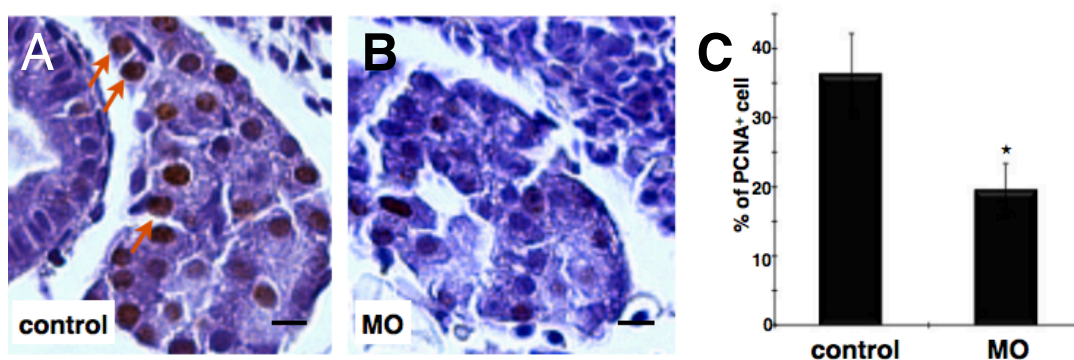

**Table S1. Cellular pathways affected by knockdown of GrnA**

| Pathways                                | # of Measured Entities |
|-----------------------------------------|------------------------|
| Cell Cycle Regulation                   | 233                    |
| Transcription factors                   | 37                     |
| DNA replication                         | 5                      |
| Ubiquitin-dependent protein degradation | 20                     |
| Apoptosis Regulation                    | 22                     |
| Translation Control                     | 116                    |
| Chromatin remodeling                    | 11                     |
| Focal Adhesion Regulation               | 17                     |
| Hedgehog Pathway                        | 43                     |
| Notch Pathway                           | 146                    |
